# Supplementary material for: Life-conditions and anthropometric variables as risk factors for oral health in children in Ladakh, a cross-sectional survey
Source: PubMed Central journal article supplement (PMC7863482; doi:10.1186/s12903-021-01407-4), 2021-02-05
Supplement: 12903_2021_1407_MOESM1_ESM.pdf [file 12903_2021_1407_MOESM1_ESM.pdf]

# **Oral Health Surveys**

Basic Methods

**5th Edition**

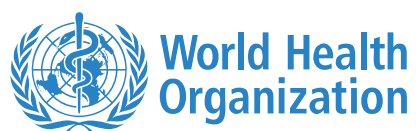

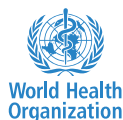

## Oral Health Questionnaire for Children

*First, we would like you to answer some questions concerning yourself and your teeth*

| Identification number                                                                                       | Sex                                                           | Location                                                                                               |
|-------------------------------------------------------------------------------------------------------------|---------------------------------------------------------------|--------------------------------------------------------------------------------------------------------|
| 1. <input type="text"/> <input type="text"/> <input type="text"/> <input type="text"/> <input type="text"/> | Boy <input type="checkbox"/><br>Girl <input type="checkbox"/> | Urban <input type="checkbox"/><br>Periurban <input type="checkbox"/><br>Rural <input type="checkbox"/> |
| 1                      4                                                                                    | 1                      2                                      | 1                      2                      3                                                        |
| 2. How old are you today? _____<br>(Years)                                                                  |                                                               |                                                                                                        |
| 3. How would you describe the health of your teeth and gums?<br>(Read each item)                            |                                                               |                                                                                                        |
|                                                                                                             | <b>Teeth</b>                                                  | <b>Gums</b>                                                                                            |
| Excellent .....                                                                                             | <input type="checkbox"/> 1                                    | <input type="checkbox"/> 1                                                                             |
| Very good.....                                                                                              | <input type="checkbox"/> 2                                    | <input type="checkbox"/> 2                                                                             |
| Good .....                                                                                                  | <input type="checkbox"/> 3                                    | <input type="checkbox"/> 3                                                                             |
| Average .....                                                                                               | <input type="checkbox"/> 4                                    | <input type="checkbox"/> 4                                                                             |
| Poor .....                                                                                                  | <input type="checkbox"/> 5                                    | <input type="checkbox"/> 5                                                                             |
| Very poor .....                                                                                             | <input type="checkbox"/> 6                                    | <input type="checkbox"/> 6                                                                             |
| Don't know .....                                                                                            | <input type="checkbox"/> 9                                    | <input type="checkbox"/> 9                                                                             |
| 4. How often during the past 12 months did you have toothache or feel discomfort due to your teeth?         |                                                               |                                                                                                        |
| Often .....                                                                                                 | <input type="checkbox"/> 1                                    |                                                                                                        |
| Occasionally.....                                                                                           | <input type="checkbox"/> 2                                    |                                                                                                        |
| Rarely .....                                                                                                | <input type="checkbox"/> 3                                    |                                                                                                        |
| Never.....                                                                                                  | <input type="checkbox"/> 4                                    |                                                                                                        |
| Don't know.....                                                                                             | <input type="checkbox"/> 9                                    |                                                                                                        |
| <i>Now please answer some questions about the care of your teeth</i>                                        |                                                               |                                                                                                        |
| 5. How often did you go to the dentist during the past 12 months?<br>(Put a tick/cross in one only)         |                                                               |                                                                                                        |
| Once.....                                                                                                   | <input type="checkbox"/> 1                                    |                                                                                                        |
| Twice.....                                                                                                  | <input type="checkbox"/> 2                                    |                                                                                                        |
| Three times .....                                                                                           | <input type="checkbox"/> 3                                    |                                                                                                        |
| Four times .....                                                                                            | <input type="checkbox"/> 4                                    |                                                                                                        |

|                                                                                                         |                            |                            |
|---------------------------------------------------------------------------------------------------------|----------------------------|----------------------------|
| More than four times.....                                                                               | <input type="checkbox"/>   | 5                          |
| I had no visit to dentist during the past 12 months.....                                                | <input type="checkbox"/>   | 6                          |
| I have never received dental care/visited a dentist.....                                                | <input type="checkbox"/>   | 7                          |
| I don't know/don't remember .....                                                                       | <input type="checkbox"/>   | 9                          |
| <b><i>If you did not see a dentist during the last 12 months, go on to question 7</i></b>               |                            |                            |
| <b>6. What was the reason for your last visit to the dentist?</b><br>(Put a tick/cross in one box only) |                            |                            |
| Pain or trouble with teeth, gums or mouth .....                                                         | <input type="checkbox"/>   | 1                          |
| Treatment/follow-up treatment .....                                                                     | <input type="checkbox"/>   | 2                          |
| Routine check-up of teeth/treatment.....                                                                | <input type="checkbox"/>   | 3                          |
| I don't know/don't remember .....                                                                       | <input type="checkbox"/>   | 9                          |
| <b>7. How often do you clean your teeth?</b><br>(Put a tick/cross in one box only)                      |                            |                            |
| Never.....                                                                                              | <input type="checkbox"/>   | 1                          |
| Several times a month (2–3 times).....                                                                  | <input type="checkbox"/>   | 2                          |
| Once a week .....                                                                                       | <input type="checkbox"/>   | 3                          |
| Several times a week (2–6 times) .....                                                                  | <input type="checkbox"/>   | 4                          |
| Once a day.....                                                                                         | <input type="checkbox"/>   | 5                          |
| 2 or more times a day .....                                                                             | <input type="checkbox"/>   | 6                          |
| <b>8. Do you use any of the following to clean your teeth or gums?</b><br>(Read each item)              |                            |                            |
|                                                                                                         | Yes                        | No                         |
|                                                                                                         | 1                          | 2                          |
| Toothbrush.....                                                                                         | <input type="checkbox"/>   | <input type="checkbox"/>   |
| Wooden toothpicks .....                                                                                 | <input type="checkbox"/>   | <input type="checkbox"/>   |
| Plastic toothpicks.....                                                                                 | <input type="checkbox"/>   | <input type="checkbox"/>   |
| Thread (dental floss) .....                                                                             | <input type="checkbox"/>   | <input type="checkbox"/>   |
| Charcoal .....                                                                                          | <input type="checkbox"/>   | <input type="checkbox"/>   |
| Chewstick/miswak.....                                                                                   | <input type="checkbox"/>   | <input type="checkbox"/>   |
| Other .....                                                                                             | <input type="checkbox"/>   | <input type="checkbox"/>   |
| Please specify _____                                                                                    |                            |                            |
| <b>9.</b>                                                                                               |                            |                            |
|                                                                                                         | Yes                        | No                         |
| a) Do you use toothpaste to clean your teeth .....                                                      | <input type="checkbox"/> 1 | <input type="checkbox"/> 2 |
|                                                                                                         | Yes                        | No                         |
| b) Do you use toothpaste that contains fluoride?....                                                    | <input type="checkbox"/> 1 | <input type="checkbox"/> 2 |
| Don't know.....                                                                                         | <input type="checkbox"/>   | 9                          |

|                                                                                                                                   |                          |                          |                          |                          |                          |                          |
|-----------------------------------------------------------------------------------------------------------------------------------|--------------------------|--------------------------|--------------------------|--------------------------|--------------------------|--------------------------|
| <b>10. Because of the state of your teeth and mouth, have you experienced any of the following problems during the past year?</b> |                          |                          |                          |                          |                          |                          |
|                                                                                                                                   | Yes                      | No                       | Don't know               |                          |                          |                          |
|                                                                                                                                   | 1                        | 2                        | 0                        |                          |                          |                          |
| (a) I am not satisfied with the appearance of my teeth .....                                                                      | <input type="checkbox"/> | <input type="checkbox"/> | <input type="checkbox"/> |                          |                          |                          |
| (b) I often avoid smiling and laughing because of my teeth .....                                                                  | <input type="checkbox"/> | <input type="checkbox"/> | <input type="checkbox"/> |                          |                          |                          |
| (c) Other children make fun of my teeth .....                                                                                     | <input type="checkbox"/> | <input type="checkbox"/> | <input type="checkbox"/> |                          |                          |                          |
| (d) Toothache or discomfort caused by my teeth forced me to miss classes at school or miss school for whole days.....             | <input type="checkbox"/> | <input type="checkbox"/> | <input type="checkbox"/> |                          |                          |                          |
| (e) I have difficulty biting hard foods .....                                                                                     | <input type="checkbox"/> | <input type="checkbox"/> | <input type="checkbox"/> |                          |                          |                          |
| (f) I have difficulty in chewing.....                                                                                             | <input type="checkbox"/> | <input type="checkbox"/> | <input type="checkbox"/> |                          |                          |                          |
| <b>11. How often do you eat or drink any of the following foods, even in small quantities?</b><br>(Read each item)                |                          |                          |                          |                          |                          |                          |
|                                                                                                                                   | Several times a day      | Every day                | Several times a week     | Once a week              | Several times a month    | Never                    |
|                                                                                                                                   | 6                        | 5                        | 4                        | 3                        | 2                        | 1                        |
| Fresh fruit.....                                                                                                                  | <input type="checkbox"/> | <input type="checkbox"/> | <input type="checkbox"/> | <input type="checkbox"/> | <input type="checkbox"/> | <input type="checkbox"/> |
| Biscuits, cakes, cream cakes, sweet pies, buns etc.....                                                                           | <input type="checkbox"/> | <input type="checkbox"/> | <input type="checkbox"/> | <input type="checkbox"/> | <input type="checkbox"/> | <input type="checkbox"/> |
| Lemonade, Coca Cola or other soft drinks ..                                                                                       | <input type="checkbox"/> | <input type="checkbox"/> | <input type="checkbox"/> | <input type="checkbox"/> | <input type="checkbox"/> | <input type="checkbox"/> |
| Jam/honey .....                                                                                                                   | <input type="checkbox"/> | <input type="checkbox"/> | <input type="checkbox"/> | <input type="checkbox"/> | <input type="checkbox"/> | <input type="checkbox"/> |
| Chewing gum containing sugar .....                                                                                                | <input type="checkbox"/> | <input type="checkbox"/> | <input type="checkbox"/> | <input type="checkbox"/> | <input type="checkbox"/> | <input type="checkbox"/> |
| Sweets/candy.....                                                                                                                 | <input type="checkbox"/> | <input type="checkbox"/> | <input type="checkbox"/> | <input type="checkbox"/> | <input type="checkbox"/> | <input type="checkbox"/> |
| Milk with sugar.....                                                                                                              | <input type="checkbox"/> | <input type="checkbox"/> | <input type="checkbox"/> | <input type="checkbox"/> | <input type="checkbox"/> | <input type="checkbox"/> |
| Tea with sugar .....                                                                                                              | <input type="checkbox"/> | <input type="checkbox"/> | <input type="checkbox"/> | <input type="checkbox"/> | <input type="checkbox"/> | <input type="checkbox"/> |
| Coffee with sugar ... ..                                                                                                          | <input type="checkbox"/> | <input type="checkbox"/> | <input type="checkbox"/> | <input type="checkbox"/> | <input type="checkbox"/> | <input type="checkbox"/> |
| <b>(Insert country-specific items)</b>                                                                                            |                          |                          |                          |                          |                          |                          |

|                                                                                                                                  |                          |                            |                          |                             |                          |                            |
|----------------------------------------------------------------------------------------------------------------------------------|--------------------------|----------------------------|--------------------------|-----------------------------|--------------------------|----------------------------|
| <b>12. How often do you use any of the following types of tobacco?</b><br>(Read each item)                                       |                          |                            |                          |                             |                          |                            |
|                                                                                                                                  | Every<br>day             | Several<br>times<br>a week | Once<br>a week           | Several<br>times<br>a month | Seldom                   | Never                      |
|                                                                                                                                  | 6                        | 5                          | 4                        | 3                           | 2                        | 1                          |
| Cigarettes, pipe or cigars ...                                                                                                   | <input type="checkbox"/> | <input type="checkbox"/>   | <input type="checkbox"/> | <input type="checkbox"/>    | <input type="checkbox"/> | <input type="checkbox"/>   |
| Chewing tobacco or snuff..                                                                                                       | <input type="checkbox"/> | <input type="checkbox"/>   | <input type="checkbox"/> | <input type="checkbox"/>    | <input type="checkbox"/> | <input type="checkbox"/>   |
| <b>13. What level of education has your father completed (or your stepfather, guardian or other male adult living with you)?</b> |                          |                            |                          |                             |                          |                            |
| No formal schooling.....                                                                                                         |                          |                            |                          |                             |                          | <input type="checkbox"/> 1 |
| Less than primary school.....                                                                                                    |                          |                            |                          |                             |                          | <input type="checkbox"/> 2 |
| Primary school completed .....                                                                                                   |                          |                            |                          |                             |                          | <input type="checkbox"/> 3 |
| Secondary school completed.....                                                                                                  |                          |                            |                          |                             |                          | <input type="checkbox"/> 4 |
| High school completed .....                                                                                                      |                          |                            |                          |                             |                          | <input type="checkbox"/> 5 |
| College/university completed .....                                                                                               |                          |                            |                          |                             |                          | <input type="checkbox"/> 6 |
| No male adult in household .....                                                                                                 |                          |                            |                          |                             |                          | <input type="checkbox"/> 7 |
| Don't know.....                                                                                                                  |                          |                            |                          |                             |                          | <input type="checkbox"/> 9 |
| <b>14. What level of education has your mother completed?</b>                                                                    |                          |                            |                          |                             |                          |                            |
| No formal schooling.....                                                                                                         |                          |                            |                          |                             |                          | <input type="checkbox"/> 1 |
| Less than primary school.....                                                                                                    |                          |                            |                          |                             |                          | <input type="checkbox"/> 2 |
| Primary school completed .....                                                                                                   |                          |                            |                          |                             |                          | <input type="checkbox"/> 3 |
| Secondary school completed.....                                                                                                  |                          |                            |                          |                             |                          | <input type="checkbox"/> 4 |
| High school completed .....                                                                                                      |                          |                            |                          |                             |                          | <input type="checkbox"/> 5 |
| College/university completed .....                                                                                               |                          |                            |                          |                             |                          | <input type="checkbox"/> 6 |
| No female adult in household.....                                                                                                |                          |                            |                          |                             |                          | <input type="checkbox"/> 7 |
| Don't know.....                                                                                                                  |                          |                            |                          |                             |                          | <input type="checkbox"/> 9 |
| <b>(Insert country-specific categories)</b>                                                                                      |                          |                            |                          |                             |                          |                            |
| <i>That completes our questionnaire</i>                                                                                          |                          |                            |                          |                             |                          |                            |
| <i>Thank you very much for your cooperation!</i>                                                                                 |                          |                            |                          |                             |                          |                            |
| Year                                                                                                                             | Month                    | Day                        | Interviewer              | District                    | Country                  |                            |
| <input type="text"/>                                                                                                             | <input type="text"/>     | <input type="text"/>       | <input type="text"/>     | <input type="text"/>        | <input type="text"/>     |                            |
